# Supplementary material
Source: publisher figshare collection journal article supplement (https://acs.figshare.com/ndownloader/files/20168195)
Supplement: Supplementary file 1 [file 20168195]

## Sheet: Sheet1
	p value	Fold change	log2 fold change	neg log p value
ACACA	0.88	0.9	-0.152003	0.0555173
ACLY	0.71	0.7	-0.514573	0.148742
ACP1	0.67	1.1	0.137504	0.173925
ACTB	0.39	1.3	0.378512	0.408935
AHNAK	0.44	1.9	0.925999	0.356547
AK1	0.0028	5.1	2.3505	2.55284
AKAP8	0.031	1.7	0.765535	1.50864
ALB	0.66	0.7	-0.514573	0.180456
ALDOA	0.67	1.4	0.485427	0.173925
ALYREF	0.37	0.8	-0.321928	0.431798
ANKRD17	0.04	0.1	-3.32193	1.39794
ANXA2	0.64	1.2	0.263034	0.19382
AQR	0.46	2	1	0.337242
ARG1	0.37	0.1	-3.32193	0.431798
ASPH	0.027	1.5	0.584963	1.56864
ATF2	0.32	0.4	-1.32193	0.49485
ATF7	0.046	0.3	-1.73697	1.33724
BCLAF1	0.22	2.5	1.32193	0.657577
BTF3	0.13	0.1	-3.32193	0.886057
C9orf114	0.064	0.4	-1.32193	1.19382
CAD	0.57	1.6	0.678072	0.244125
CALML5	0.53	0.4	-1.32193	0.275724
CANX	0.27	14	3.80735	0.568636
CAPRIN1	0.23	0.7	-0.514573	0.638272
CASP14	0.19	0.2	-2.32193	0.721246
CCAR1	0.65	1.9	0.925999	0.187087
CCAR2	0.028	2.9	1.53605	1.55284
CCDC86	0.4	0.3	-1.73697	0.39794
CCT2	0.38	3.7	1.88753	0.420216
CD3EAP	0.063	0.5	-1	1.20066
CDC5L	0.22	0.03	-5.05889	0.657577
CDCA2	0.32	0.05	-4.32193	0.49485
CDK13	0.11	0.3	-1.73697	0.958607
CDK9	0.51	0.3	-1.73697	0.29243
CEBPZ	0.14	0.3	-1.73697	0.853872
CELF1	0.098	1.4	0.485427	1.00877
CFL1	0.98	1	0	0.00877392
CHD3	0.27	0.07	-3.8365	0.568636
CHD7	0.25	0.08	-3.64386	0.60206
CHERP	0.81	1.3	0.378512	0.091515
CIRBP	0.67	0.9	-0.152003	0.173925
CLP1	0.61	1.4	0.485427	0.21467
CMPK1	0.046	2.7	1.43296	1.33724
CNBP	0.4	0.7	-0.514573	0.39794
COLGALT1	0.33	2.1	1.07039	0.481486
CORO1C	0.97	1.1	0.137504	0.0132283
CPS1	0.83	0.9	-0.152003	0.0809219
CPSF6	0.22	1.2	0.263034	0.657577
CPSF7	0.11	2.5	1.32193	0.958607
CSDE1	0.43	1.1	0.137504	0.366532
CSTF2	0.26	1.2	0.263034	0.585027
CSTF2T	0.23	1.2	0.263034	0.638272
CSTF3	0.21	3.5	1.80735	0.677781
CTCF	0.074	0.3	-1.73697	1.13077
CTTN	0.98	1	0	0.00877392
DAZAP1	0.34	0.9	-0.152003	0.468521
DDX1	0.35	1.7	0.765535	0.455932
DDX17	0.26	0.9	-0.152003	0.585027
DDX21	0.14	0.4	-1.32193	0.853872
DDX27	0.23	0.04	-4.64386	0.638272
DDX3X	0.23	1.2	0.263034	0.638272
DDX5	0.32	0.7	-0.514573	0.49485
DDX56	0.13	0.04	-4.64386	0.886057
DHX15	0.43	1.4	0.485427	0.366532
DHX30	0.84	1.2	0.263034	0.0757207
DHX36	0.65	1.1	0.137504	0.187087
DHX37	0.46	0.5	-1	0.337242
DHX9	0.92	1	0	0.0362122
DIDO1	0.37	0.1	-3.32193	0.431798
DIS3L	0.23	12	3.58496	0.638272
DKC1	0.98	1	0	0.00877392
DKFZp686J1372	0.7	1.8	0.847997	0.154902
DNTTIP1	0.37	0.09	-3.47393	0.431798
DSG1	0.81	0.8	-0.321928	0.091515
DSP	0.82	0.8	-0.321928	0.0861861
DUS3L	0.16	1.6	0.678072	0.79588
DYNC1H1	0.73	0.7	-0.514573	0.136677
EEF1A1	0.44	1.3	0.378512	0.356547
EEF2	0.71	1.1	0.137504	0.148742
EIF1AX	0.06	0.5	-1	1.22185
EIF3A	0.6	0.5	-1	0.221849
EIF3G	0.45	2.5	1.32193	0.346787
EIF4A1	0.19	2.6	1.37851	0.721246
EIF4B	0.081	1.5	0.584963	1.09151
EIF4H	0.52	1.3	0.378512	0.283997
EIF5A	0.68	0.9	-0.152003	0.167491
ELAVL1	0.66	1.1	0.137504	0.180456
EME1	0.68	0.7	-0.514573	0.167491
ENO1	0.4	1.3	0.378512	0.39794
EPRS	0.053	5.4	2.43296	1.27572
ERP44	0.73	0.9	-0.152003	0.136677
ESRP2	0.4	1.3	0.378512	0.39794
EWSR1	0.072	1.3	0.378512	1.14267
FAM102B	0.56	0.4	-1.32193	0.251812
FAM103A1	0.93	1	0	0.0315171
FAM120A	0.97	1	0	0.0132283
FASN	0.72	1.2	0.263034	0.142668
FBL	0.9	0.9	-0.152003	0.0457575
FEN1	0.9	0.9	-0.152003	0.0457575
FIZ1	0.37	9.1	3.18587	0.431798
FLG2	0.75	0.8	-0.321928	0.124939
FLNA	0.085	1.6	0.678072	1.07058
FLNB	0.95	0.9	-0.152003	0.0222764
FMR1	0.72	0.8	-0.321928	0.142668
FOS	0.37	0.09	-3.47393	0.431798
FOSL2	0.31	0.4	-1.32193	0.508638
FUBP1	0.67	1.1	0.137504	0.173925
FUBP1	0.57	1.1	0.137504	0.244125
FUBP3	0.58	1.1	0.137504	0.236572
FUS	0.21	1.2	0.263034	0.677781
FXR1	0.61	0.6	-0.736966	0.21467
FXR2	0.11	0.4	-1.32193	0.958607
G3BP1	0.67	0.9	-0.152003	0.173925
G3BP2	0.81	1.1	0.137504	0.091515
GANAB	0.24	4.3	2.10434	0.619789
GAPDH	0.9	1	0	0.0457575
GART	0.65	0.7	-0.514573	0.187087
GCN1	0.66	1.8	0.847997	0.180456
GEMIN5	0.88	1.2	0.263034	0.0555173
GLG1	0.25	0.08	-3.64386	0.60206
GNL3	0.7	0.8	-0.321928	0.154902
GRSF1	0.71	0.9	-0.152003	0.148742
GRWD1	0.26	0.07	-3.8365	0.585027
GTF2I	0.46	0.4	-1.32193	0.337242
GTF3C1	0.35	0.3	-1.73697	0.455932
GTF3C2	0.31	0.2	-2.32193	0.508638
GTF3C3	0.25	0.3	-1.73697	0.60206
GTF3C5	0.22	0.2	-2.32193	0.657577
HDGF	0.18	0.6	-0.736966	0.744727
HDLBP	0.25	1.3	0.378512	0.60206
HELZ2	0.87	0.8	-0.321928	0.0604807
HEXIM1	0.91	1.1	0.137504	0.0409586
HIST1H1C	0.15	1.5	0.584963	0.823909
HIST1H2BN	0.8	0.9	-0.152003	0.09691
HMGB1	0.51	0.9	-0.152003	0.29243
HMGB2	0.67	0.8	-0.321928	0.173925
HMGB3	0.2	0.2	-2.32193	0.69897
HNRNPA0	0.88	1	0	0.0555173
HNRNPA1	0.096	0.8	-0.321928	1.01773
HNRNPA2B1	0.63	0.9	-0.152003	0.200659
HNRNPA3	0.37	0.8	-0.321928	0.431798
HNRNPAB	0.52	1.2	0.263034	0.283997
HNRNPC	0.86	0.8	-0.321928	0.0655015
HNRNPD	0.37	1.3	0.378512	0.431798
HNRNPD	0.4	1.5	0.584963	0.39794
HNRNPDL	0.58	0.9	-0.152003	0.236572
HNRNPF	0.33	1.3	0.378512	0.481486
HNRNPH1	0.29	1.1	0.137504	0.537602
HNRNPH2	0.47	1.1	0.137504	0.327902
HNRNPH3	0.69	1	0	0.161151
HNRNPK	0.24	1.1	0.137504	0.619789
HNRNPL	0.71	1.1	0.137504	0.148742
HNRNPM	0.11	1.3	0.378512	0.958607
HNRNPR	0.77	1	0	0.113509
HNRNPU	0.64	1.1	0.137504	0.19382
HNRNPUL1	0.73	1.1	0.137504	0.136677
HNRNPUL2	0.69	0.9	-0.152003	0.161151
HSP90AA1	0.055	1.9	0.925999	1.25964
HSP90AB1	0.027	1.6	0.678072	1.56864
HSP90B1	0.2	1.9	0.925999	0.69897
HSPA1B	0.62	1.6	0.678072	0.207608
HSPA5	0.9	1	0	0.0457575
HSPA8	0.29	1.2	0.263034	0.537602
HSPA9	0.092	2.2	1.1375	1.03621
HSPD1	0.012	2	1	1.92082
HTATSF1	0.23	0.7	-0.514573	0.638272
HUWE1	0.74	0.8	-0.321928	0.130768
IARS2	0.86	1.3	0.378512	0.0655015
IGF2BP1	0.22	2.9	1.53605	0.657577
IGF2BP3	0.41	1.4	0.485427	0.387216
ILF2	0.17	0.6	-0.736966	0.769551
ILF3	0.26	1.5	0.584963	0.585027
IMPDH2	0.18	4.1	2.03562	0.744727
IQGAP1	0.25	0.6	-0.736966	0.60206
IRS2	0.18	3.3	1.72247	0.744727
JUNB	0.33	0.5	-1	0.481486
JUND	0.35	0.4	-1.32193	0.455932
JUP	0.84	1.2	0.263034	0.0757207
KHSRP	0.21	1.3	0.378512	0.677781
KIAA1522	0.016	0.02	-5.64386	1.79588
KPNA2	0.31	0.8	-0.321928	0.508638
KPRP	0.67	0.6	-0.736966	0.173925
KRT1	0.96	1	0	0.0177288
KRT10	0.73	0.8	-0.321928	0.136677
KRT14	0.53	1.4	0.485427	0.275724
KRT16	0.62	1.5	0.584963	0.207608
KRT17	0.55	2	1	0.259637
KRT2	0.97	1	0	0.0132283
KRT5	0.88	1.1	0.137504	0.0555173
KRT6A	0.49	1.4	0.485427	0.309804
KRT77	0.83	0.8	-0.321928	0.0809219
KRT78	0.84	0.8	-0.321928	0.0757207
LARP1	0.68	1.2	0.263034	0.167491
LARP7	0.0044	1.6	0.678072	2.35655
LDHA	0.48	1.2	0.263034	0.318759
LMNA	0.0054	3.8	1.926	2.26761
LRP1B	0.32	0.1	-3.32193	0.49485
LRPPRC	0.15	1.2	0.263034	0.823909
LRRFIP1	0.78	0.8	-0.321928	0.107905
LSM1	0.79	1.4	0.485427	0.102373
LSM14A	0.75	1.3	0.378512	0.124939
LSM2	0.15	2	1	0.823909
LSM4	0.042	3.5	1.80735	1.37675
LSM5	0.62	1.2	0.263034	0.207608
LSM6	0.057	9.4	3.23266	1.24413
LSM8	0.51	1.3	0.378512	0.29243
LUC7L2	0.87	1.2	0.263034	0.0604807
LUC7L3	0.25	0.7	-0.514573	0.60206
MANF	0.19	2.3	1.20163	0.721246
MAP4	0.86	1.1	0.137504	0.0655015
MATR3	0.63	1.2	0.263034	0.200659
MAZ	0.43	1.6	0.678072	0.366532
MBD1	0.25	0.2	-2.32193	0.60206
MCM3	0.19	1.1	0.137504	0.721246
MEPCE	0.1	0.7	-0.514573	1
MEX3B	0.34	1.7	0.765535	0.468521
MEX3C	0.09	0.6	-0.736966	1.04576
MICU1	0.67	0.6	-0.736966	0.173925
MSH2	0.28	0.7	-0.514573	0.552842
MSH6	0.6	0.6	-0.736966	0.221849
MSI2	0.91	1	0	0.0409586
MSN	0.47	1.4	0.485427	0.327902
MT1X	0.47	0.6	-0.736966	0.327902
MTHFD1	0.68	1.5	0.584963	0.167491
MTO1	0.46	0.4	-1.32193	0.337242
MUS81	0.56	1.8	0.847997	0.251812
MYBBP1A	0.38	0.3	-1.73697	0.420216
MYH9	0.67	1.5	0.584963	0.173925
MYL6	0.95	1	0	0.0222764
NAT10	0.71	0.7	-0.514573	0.148742
NCL	0.91	1	0	0.0409586
NCL	0.91	1	0	0.0409586
NELFE	0.86	0.9	-0.152003	0.0655015
NIFK	0.15	0.2	-2.32193	0.823909
NONO	0.034	1.3	0.378512	1.46852
NOP56	0.85	1.2	0.263034	0.0705811
NOP58	0.41	0.4	-1.32193	0.387216
NPM1	0.3	0.8	-0.321928	0.522879
NSUN2	0.68	0.9	-0.152003	0.167491
NUDT21	0.062	1.3	0.378512	1.20761
NXF1	0.47	0.7	-0.514573	0.327902
P4HB	0.45	1.3	0.378512	0.346787
PABPC1	0.021	2	1	1.67778
PABPC4	0.079	2.1	1.07039	1.10237
PABPN1	0.8	0.9	-0.152003	0.09691
PARG	0.47	0.2	-2.32193	0.327902
PARN	0.25	1.4	0.485427	0.60206
PARP1	0.97	1	0	0.0132283
PCBP1	0.19	0.8	-0.321928	0.721246
PCBP2	0.75	0.9	-0.152003	0.124939
PCF11	0.29	0.5	-1	0.537602
PDCD11	0.82	1.2	0.263034	0.0861861
PDIA3	0.068	1.6	0.678072	1.16749
PDIA4	0.09	3.4	1.76553	1.04576
PDIA6	0.35	1.3	0.378512	0.455932
PES1	0.11	0.07	-3.8365	0.958607
PGK1	0.36	1.1	0.137504	0.443697
PHF6	0.22	0.4	-1.32193	0.657577
PIP5K1A	0.35	0.2	-2.32193	0.455932
PIP5K1C	0.61	0.5	-1	0.21467
PKM	0.31	0.6	-0.736966	0.508638
PLOD1	0.59	1.3	0.378512	0.229148
PLOD2	0.33	2.8	1.48543	0.481486
PNPLA6	0.088	0.1	-3.32193	1.05552
POLD1	0.72	1.3	0.378512	0.142668
POLR1A	0.25	0.2	-2.32193	0.60206
POLR1B	0.35	0.2	-2.32193	0.455932
POLR1E	0.47	0.5	-1	0.327902
POLR2A	0.61	0.5	-1	0.21467
POLR2B	0.7	0.7	-0.514573	0.154902
POLRMT	0.44	0.3	-1.73697	0.356547
POP1	0.46	0.3	-1.73697	0.337242
PPIA	0.89	1	0	0.05061
PPIB	0.79	0.9	-0.152003	0.102373
PPP2R1A	0.85	1.2	0.263034	0.0705811
PRDM10	0.87	1.1	0.137504	0.0604807
PRDX1	0.12	1.6	0.678072	0.920819
PRDX4	0.31	1.5	0.584963	0.508638
PRDX5	0.95	1.1	0.137504	0.0222764
PRKDC	0.99	1	0	0.00436481
PRMT1	0.28	1.9	0.925999	0.552842
PRPF31	0.32	0.5	-1	0.49485
PRPF8	0.34	0.3	-1.73697	0.468521
PRRC2A	0.7	1.3	0.378512	0.154902
PRRC2C	0.77	0.8	-0.321928	0.113509
PSIP1	0.59	0.7	-0.514573	0.229148
PSPC1	0.63	1.2	0.263034	0.200659
PTBP1	0.98	1	0	0.00877392
PUF60	0.91	1	0	0.0409586
PUM1	0.68	1.6	0.678072	0.167491
PURA	0.32	0.9	-0.152003	0.49485
PURB	0.74	1.1	0.137504	0.130768
PUS1	0.39	1.6	0.678072	0.408935
PUS7	0.49	1.5	0.584963	0.309804
RBM10	0.97	1	0	0.0132283
RBM12	0.046	1.7	0.765535	1.33724
RBM14	0.16	1.4	0.485427	0.79588
RBM15	0.97	1	0	0.0132283
RBM19	0.47	1.1	0.137504	0.327902
RBM22	0.53	1.7	0.765535	0.275724
RBM28	0.77	1.2	0.263034	0.113509
RBM3	0.92	1	0	0.0362122
RBM38	0.83	1.1	0.137504	0.0809219
RBM39	0.28	0.7	-0.514573	0.552842
RBM4	0.61	1.2	0.263034	0.21467
RBM42	0.33	1.5	0.584963	0.481486
RBM47	0.87	1.2	0.263034	0.0604807
RBM4B	0.16	1.5	0.584963	0.79588
RBM5	0.11	1.4	0.485427	0.958607
RBMS1	0.89	1.1	0.137504	0.05061
RBMS2	0.63	0.9	-0.152003	0.200659
RBMX	0.12	1.5	0.584963	0.920819
RCC2	0.79	0.8	-0.321928	0.102373
RECQL4	0.16	0.2	-2.32193	0.79588
RNMT	0.88	1.1	0.137504	0.0555173
RPA1	0.93	1	0	0.0315171
RPL10	0.79	0.8	-0.321928	0.102373
RPL11	0.83	0.9	-0.152003	0.0809219
RPL15	0.79	1.4	0.485427	0.102373
RPL17-C18orf32	0.99	1	0	0.00436481
RPL18	0.21	0.2	-2.32193	0.677781
RPL22	0.0026	0.3	-1.73697	2.58503
RPL23	0.47	2.4	1.26303	0.327902
RPL23A	0.71	0.8	-0.321928	0.148742
RPL3	0.93	1.1	0.137504	0.0315171
RPL30	0.95	1	0	0.0222764
RPL36A	0.33	2.3	1.20163	0.481486
RPL38	0.026	0.6	-0.736966	1.58503
RPL4	0.75	0.8	-0.321928	0.124939
RPL5	0.25	0.3	-1.73697	0.60206
RPL6	0.53	1.6	0.678072	0.275724
RPL9	0.78	0.8	-0.321928	0.107905
RPN1	0.83	0.8	-0.321928	0.0809219
RPS10	0.76	1.1	0.137504	0.119186
RPS12	0.49	0.8	-0.321928	0.309804
RPS15	0.4	0.4	-1.32193	0.39794
RPS17	0.14	0.5	-1	0.853872
RPS18	0.34	0.3	-1.73697	0.468521
RPS19	0.73	0.9	-0.152003	0.136677
RPS2	0.52	0.9	-0.152003	0.283997
RPS20	0.75	1.2	0.263034	0.124939
RPS21	0.68	0.7	-0.514573	0.167491
RPS26	0.47	0.4	-1.32193	0.327902
RPS27A	0.17	0.5	-1	0.769551
RPS3	0.032	2.3	1.20163	1.49485
RPS3A	0.95	1.1	0.137504	0.0222764
RPS4X	0.17	0.6	-0.736966	0.769551
RPS6	0.43	0.5	-1	0.366532
RPS7	0.044	0.4	-1.32193	1.35655
RPS8	0.5	1.8	0.847997	0.30103
RPS9	0.21	0.2	-2.32193	0.677781
RPSA	0.79	0.8	-0.321928	0.102373
RPUSD2	0.37	1.8	0.847997	0.431798
RRBP1	0.66	1.7	0.765535	0.180456
RRP1	0.17	0.06	-4.05889	0.769551
RRP12	0.061	0.3	-1.73697	1.21467
RRP1B	0.077	0.2	-2.32193	1.11351
RRP8	0.039	0.1	-3.32193	1.40894
RSBN1	0.28	0.09	-3.47393	0.552842
RTCB	0.87	0.8	-0.321928	0.0604807
S100A7	0.14	0.06	-4.05889	0.853872
S100A9	0.37	0.1	-3.32193	0.431798
SAFB	0.68	1.6	0.678072	0.167491
SART1	0.15	0.3	-1.73697	0.823909
SART3	0.34	1.2	0.263034	0.468521
SBSN	0.37	0.07	-3.8365	0.431798
SCAF11	0.54	0.8	-0.321928	0.267606
SELENOH	0.88	1.1	0.137504	0.0555173
SERBP1	0.48	1.1	0.137504	0.318759
SF3B1	0.61	1.7	0.765535	0.21467
SF3B2	0.69	1.2	0.263034	0.161151
SF3B4	0.31	0.8	-0.321928	0.508638
SFPQ	0.28	1.3	0.378512	0.552842
SKIV2L2	0.45	2.7	1.43296	0.346787
SLC25A5	0.55	1.2	0.263034	0.259637
SLC3A2	0.72	1.3	0.378512	0.142668
SLC4A1AP	0.68	1.2	0.263034	0.167491
SLTM	0.97	1	0	0.0132283
SND1	0.19	1.6	0.678072	0.721246
SNRNP200	0.97	1	0	0.0132283
SNRNP70	0.32	0.8	-0.321928	0.49485
SNRPA	0.17	7	2.80735	0.769551
SNRPC	0.076	1.9	0.925999	1.11919
SNRPD1	0.1	0.8	-0.321928	1
SNRPD2	0.14	0.5	-1	0.853872
SNRPD3	0.73	1.1	0.137504	0.136677
SNRPG	0.85	1.1	0.137504	0.0705811
SP1	0.039	0.5	-1	1.40894
SPEN	0.3	0.4	-1.32193	0.522879
SRP14	0.37	0.9	-0.152003	0.431798
SRP9	0.65	1.2	0.263034	0.187087
SRRM2	0.77	1.2	0.263034	0.113509
SRRT	0.32	1.4	0.485427	0.49485
SRSF1	0.3	0.6	-0.736966	0.522879
SRSF10	0.77	0.9	-0.152003	0.113509
SRSF11	0.88	1.1	0.137504	0.0555173
SRSF2	0.99	1	0	0.00436481
SRSF3	0.28	0.8	-0.321928	0.552842
SRSF4	0.84	1.1	0.137504	0.0757207
SRSF5	0.69	0.9	-0.152003	0.161151
SRSF6	0.69	1.2	0.263034	0.161151
SRSF7	0.73	1.1	0.137504	0.136677
SRSF8	0.84	1.1	0.137504	0.0757207
SRSF9	0.72	0.9	-0.152003	0.142668
SSB	0.12	1.1	0.137504	0.920819
SSBP1	0.11	1.9	0.925999	0.958607
STIP1	0.27	8.9	3.15381	0.568636
STRAP	0.33	1.4	0.485427	0.481486
STRBP	0.94	1.1	0.137504	0.0268721
SUB1	0.82	1.1	0.137504	0.0861861
SUGP2	0.044	0.2	-2.32193	1.35655
SUZ12	0.48	0.6	-0.736966	0.318759
SYNCRIP	0.062	0.8	-0.321928	1.20761
TAF15	0.34	1.1	0.137504	0.468521
TARDBP	0.34	1.1	0.137504	0.468521
TFAM	0.5	0.8	-0.321928	0.30103
TFRC	0.95	1	0	0.0222764
THRAP3	0.65	1.1	0.137504	0.187087
THUMPD1	0.66	1	0	0.180456
TIA1	0.86	0.9	-0.152003	0.0655015
TIAL1	0.035	1.3	0.378512	1.45593
TKT	0.051	3	1.58496	1.29243
TLN1	0.21	3.7	1.88753	0.677781
TMPO	1	1	0	0
TOP1	0.71	0.8	-0.321928	0.148742
TPI1	0.94	0.9	-0.152003	0.0268721
TPR	0.21	0.5	-1	0.677781
TRA2B	0.09	0.8	-0.321928	1.04576
TRIM25	0.78	0.9	-0.152003	0.107905
TRIM28	0.51	0.7	-0.514573	0.29243
TRIM56	0.74	1.1	0.137504	0.130768
TRMT1	0.93	0.9	-0.152003	0.0315171
TRMT1L	0.8	0.8	-0.321928	0.09691
TRMT2B	0.66	1.4	0.485427	0.180456
TRPT1	0.27	0.4	-1.32193	0.568636
TSEN54	0.14	2.2	1.1375	0.853872
TSN	0.15	2.9	1.53605	0.823909
TSNAX	0.066	3.7	1.88753	1.18046
TSR1	0.23	0.2	-2.32193	0.638272
TUBA1B	0.94	1	0	0.0268721
TUBB	0.9	1	0	0.0457575
TUBB4B	0.73	0.9	-0.152003	0.136677
TXN	0.66	0.7	-0.514573	0.180456
TXNDC5	0.095	1.9	0.925999	1.02228
U2AF1	1	1	0	0
U2AF2	0.91	1	0	0.0409586
U2SURP	0.86	1.1	0.137504	0.0655015
UBA1	0.63	1.4	0.485427	0.200659
UBAP2L	0.72	1.4	0.485427	0.142668
UGGT1	0.37	0.1	-3.32193	0.431798
USP10	0.12	0.3	-1.73697	0.920819
USP7	0.64	1.2	0.263034	0.19382
USP9X	0.73	1.5	0.584963	0.136677
UTP14A	0.35	0.5	-1	0.455932
XP32	0.5	0.4	-1.32193	0.30103
XPO1	0.93	1.1	0.137504	0.0315171
XRN1	0.58	1.7	0.765535	0.236572
XRN2	0.39	2.1	1.07039	0.408935
YBX1	0.28	0.7	-0.514573	0.552842
YBX3	0.42	0.7	-0.514573	0.376751
YTHDC2	0.8	1.4	0.485427	0.09691
YTHDF1	0.018	27	4.75489	1.74473
YTHDF2	0.017	32	5	1.76955
YWHAQ	0.87	0.9	-0.152003	0.0604807
ZBTB21	0.15	0.1	-3.32193	0.823909
ZBTB7A	0.36	0.3	-1.73697	0.443697
ZC3H4	0.31	1.7	0.765535	0.508638
ZC3H8	0.97	1	0	0.0132283
ZC3HAV1	0.49	0.8	-0.321928	0.309804
ZCCHC6	0.47	0.4	-1.32193	0.327902
ZCCHC8	0.37	1.5	0.584963	0.431798
ZFP91	0.049	0.2	-2.32193	1.3098
ZFR	0.95	1.1	0.137504	0.0222764
ZNF148	0.13	0.3	-1.73697	0.886057
ZNF316	0.49	1.8	0.847997	0.309804
ZNF335	0.00093	0.1	-3.32193	3.03152
ZNF579	0.15	0.1	-3.32193	0.823909
ZNF646	0.069	0.02	-5.64386	1.16115
ZNF787	0.35	0.7	-0.514573	0.455932
ZRANB2	0.65	1.1	0.137504	0.187087
